# Supplementary material for: Synthesis and functionalization of scalable and versatile 2D protein films via amyloid-like aggregation
Source: Springer Nature journal article supplement (doi:10.1038/s41596-023-00918-4), 2023-12-04
Supplement: MOESM1 [file 41596_2023_918_MOESM1_ESM12.pdf]

# Synthesis and functionalization of scalable and versatile 2D protein films via amyloid-like aggregation

In the format provided by the authors and unedited

## **Synthesis and functionalization of scalable and versatile 2D protein films via amyloid-like aggregation**

Yongchun Liu<sup>+</sup>, Shuting Miao<sup>+</sup>, Hao Ren<sup>+</sup>, Lihua Tian, Jian Zhao, Peng Yang<sup>\*</sup>

[\*] Key Laboratory of Applied Surface and Colloid Chemistry, Ministry of Education, School of Chemistry and Chemical Engineering, Shaanxi Normal University, Xi'an 710119, China

Email: [yangpeng@snnu.edu.cn](mailto:yangpeng@snnu.edu.cn)

[+] These authors contributed equally to this work.

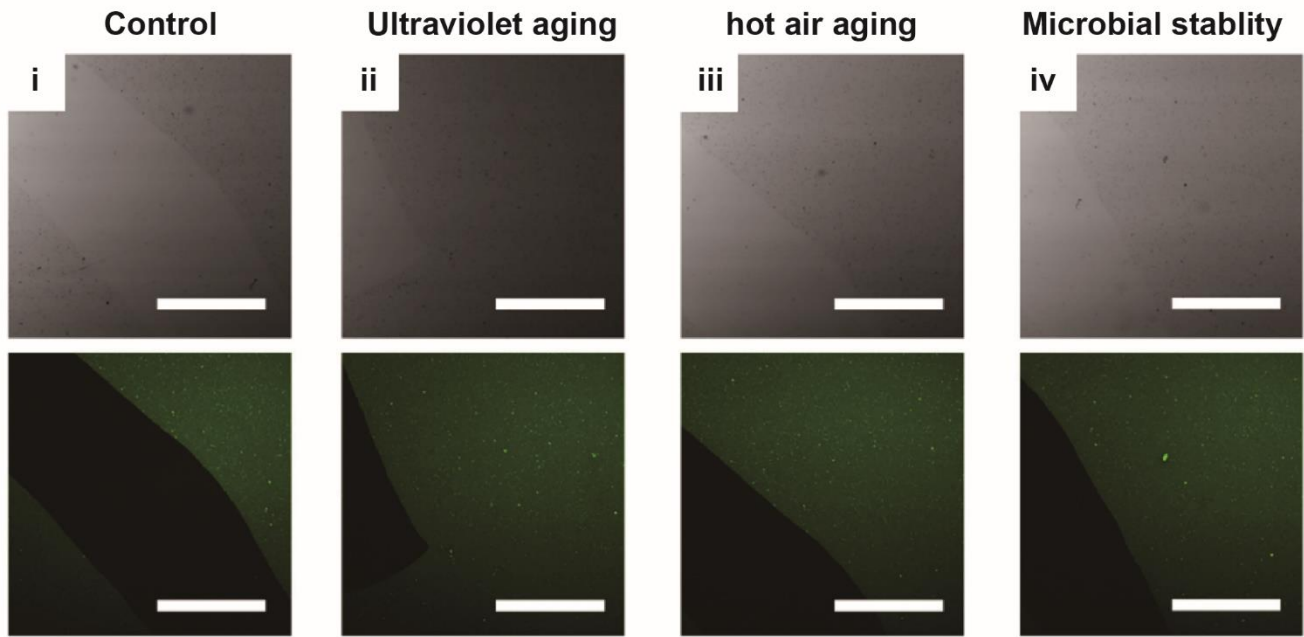

**Supplementary Fig. 1 | Weather resistance test of lysozyme film.** The bright field and fluorescence images show lysozyme films stained with ThT. The films were subjected to various aging tests to assess their weather resistance. The hot air aging test involved placing the film in an oven at 80°C for 60 days, while the ultraviolet aging test involved exposing the film to a 9 W ultraviolet lamp at a distance of 5 cm for 60 days. The microbial environmental corrosion test involved placing the film in a microorganism breeding environment containing *E. coli* (about  $5 \times 10^5$  CFU/mL) and *S. aureus* (about  $5 \times 10^5$  CFU/mL) in incubator at 37 °C. Panels adapted with permission from ref.<sup>1</sup>, RSC.

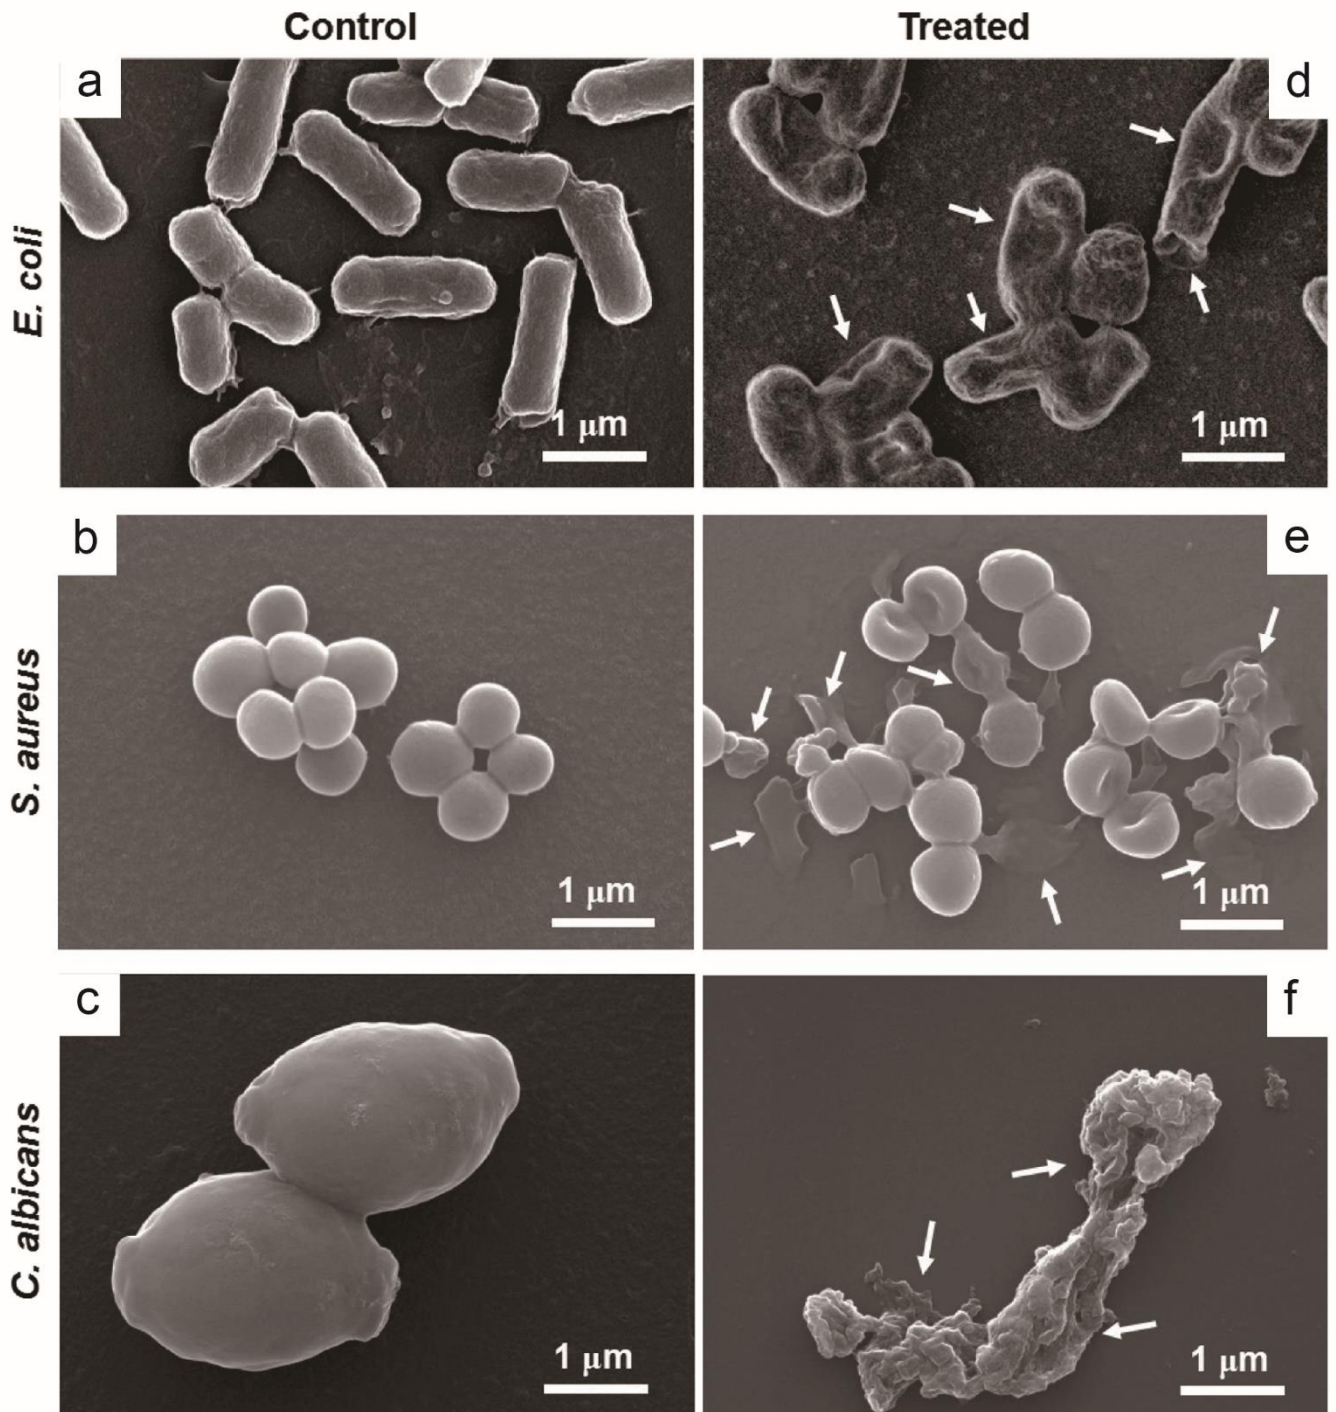

**Supplementary Fig.2 | SEM images of an antimicrobial test conducted on the surface of lysozyme film. a-c,** SEM images of the control group without the lysozyme coating after exposure to three types of microbes. **d-f,** SEM images of the treated group with the film-coated surface after exposure to three types of microbes. The white arrows in panels (d-f) indicate that the cell walls of the microbes were either deformed or destroyed on the lysozyme film surface, suggesting a potential perturbation of the cell membrane by lysozyme. Panels adapted with permission from ref.<sup>2</sup>, RSC.

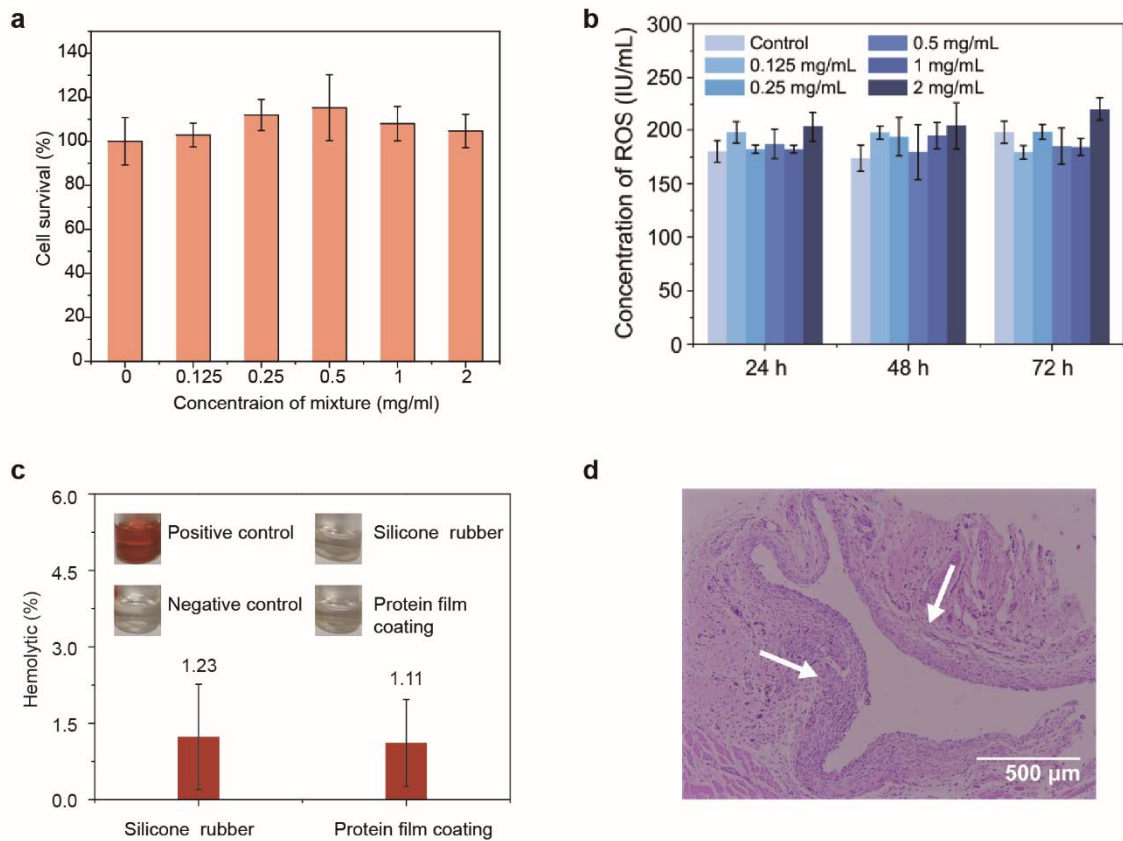

**Supplementary Fig. 3 | Biocompatibility of 2D protein film.** **a**, Cell survival of 3T3 mouse fibroblast cells treated with different concentrations of 2D BSA film. **b**, Measurement of reactive oxygen species (ROS) content in 3T3 cells using enzyme-linked immunosorbent assay (ELISA) after treatment with varying concentrations of 2D BSA film. **c**, Hemolysis assay performed on silicone rubber coated with the protein film. The PTB coating showed a low hemolytic effect on red blood cells. In the inset optical photographs, the positive control depicts ruptured red blood cells releasing a large amount of hemoglobin, while the negative control shows no ruptured red blood cells in normal saline. The silicone rubber and protein film coating demonstrated no significant red blood cell rupture. **d**, Histopathologic evaluation of tissue biocompatibility revealed that the capsule (white arrows) consisted mostly of fibroblastic proliferation associated with collagen deposition, without any active inflammatory reaction or necrosis present. Panels adapted with permission from ref.<sup>3</sup>, Wiley.

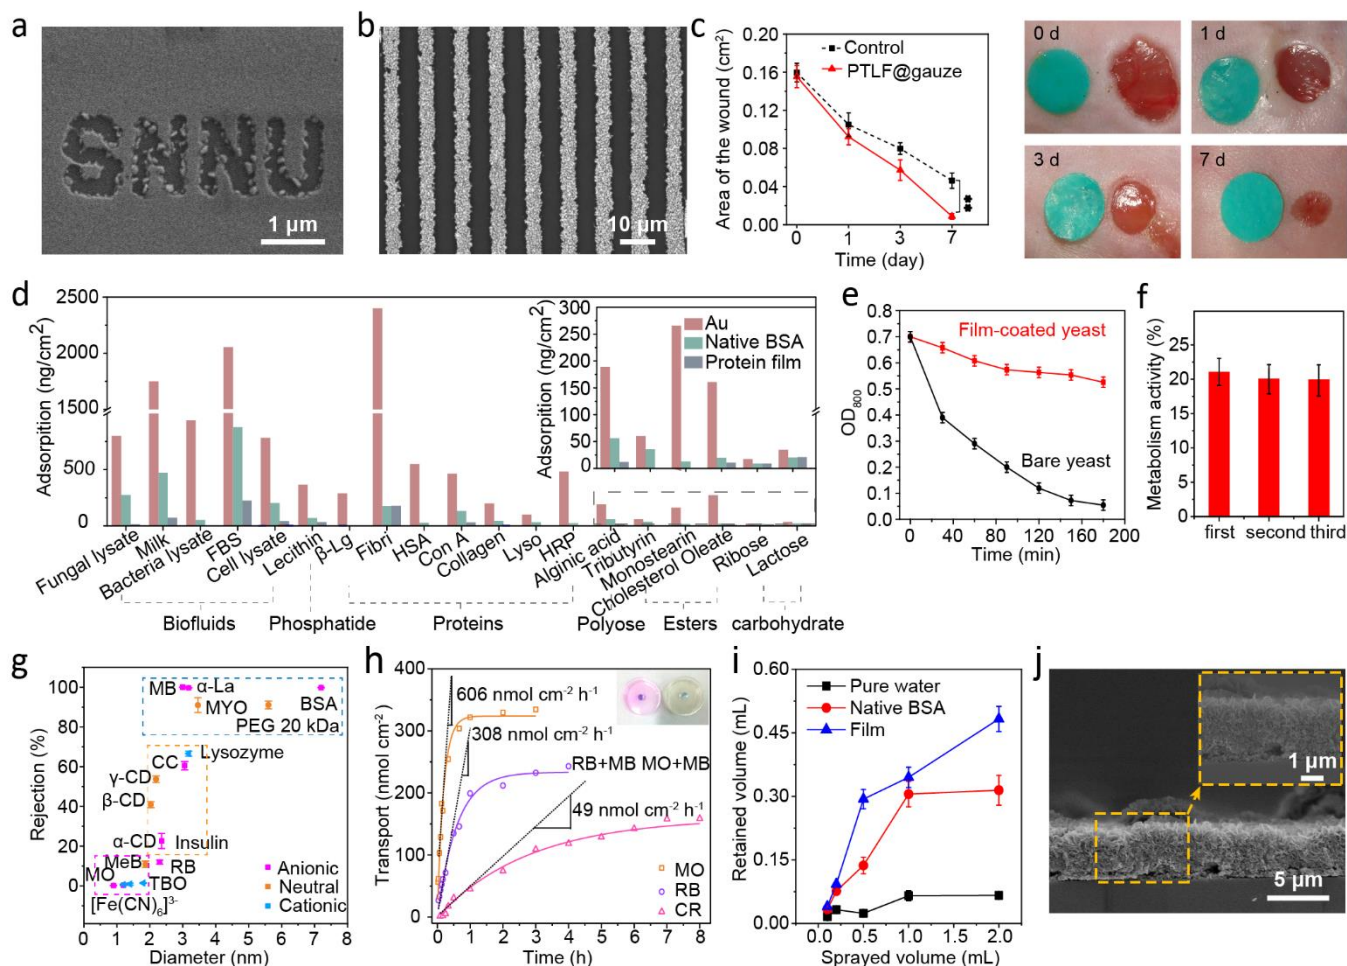

**Supplementary Fig. 4 | Applications of pure 2D protein films.** **a-b**, Micro/nanofabrication. SEM image of the nanopatterning on Cu surface (**a**) after electron beam lithographic etching by using protein film as the resist. SEM image of the patterned Ag layer (**b**) by electroless deposition (ELD) of Ag on the patterned protein film. **c**, Protein film-coated wound dressings toward anti-infection and wound healing. The change of size and macroscopic appearance of the wounds post-surgery treated by gauze coated with lysozyme film (PTLF@gauze). **d**, Antifouling coating. The adsorption amount of different molecules on bare Au chip, native BSA adsorption layer, or PTB-coated Au chips. **e-f**, Artificial spores. Protective effect of PTL-coated yeast against the zymolyase (**e**). Repeated measurements of the metabolic activity of a protein film-immobilized yeast layer (**f**). **g-h**, Molecular separation and dialysis. Separation performance for neutral and ionic compounds (**g**). Time-dependent transport of dyes and the transport rate (**h**). Optical photographs to show the film rejects large molecules (methyl blue, MB) while allowing small molecules (methyl orange, MO and rhodamine B, RB) to pass through.<sup>4</sup> **i**, Pesticide deposition enhancement. Retained volume of pure water, native BSA, or the as-prepared PTB solution on a lotus leaf surface after spraying.<sup>5</sup> **j**, Biomaterialization. The FE-SEM images of hydroxyapatite cross-section on the protein film after incubation for 2 weeks. Panels adapted with permission from **a, b**, ref.<sup>6</sup>, Wiley; **c**, ref.<sup>7</sup>, RSC; **d**, ref.<sup>3</sup>, Wiley; **e, f**, ref.<sup>8</sup>, Wiley; **J**, ref.<sup>9</sup>, Wiley.



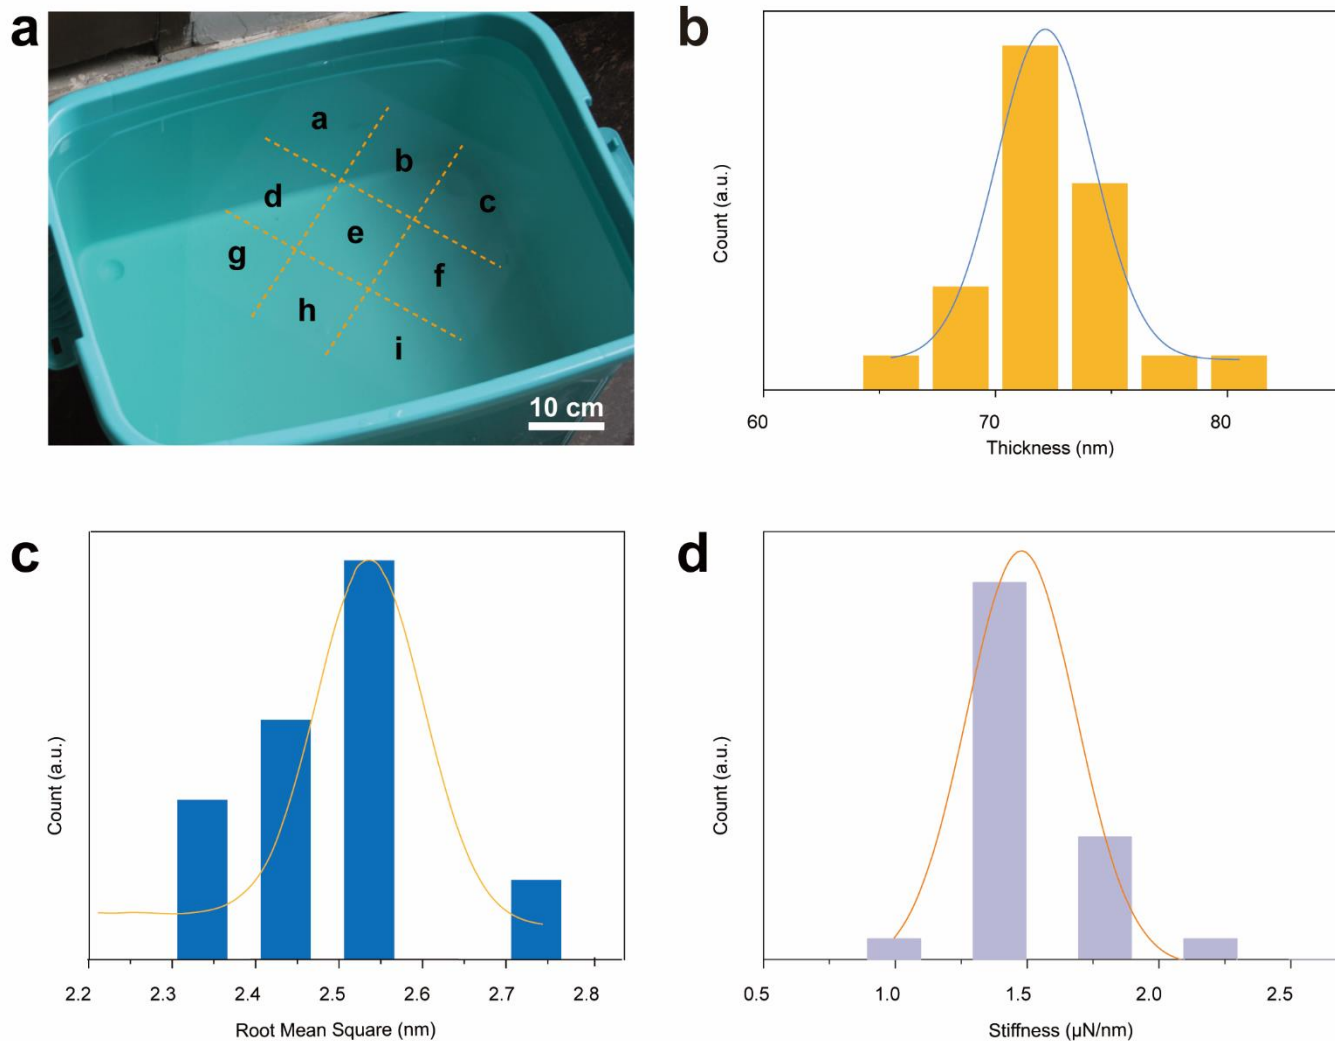

**Supplementary Fig. 5 | Characterization of homogeneity of 2D protein film.** **a**, Photo image showing nine regions of the protein film, labeled as a, b, c, d, e, f, g, h and i, for analyzing the homogeneity. **b**, The thickness frequency distribution of protein films measured by SEM, coefficient of variation=4.5%. **c**, The root mean square (RMS) frequency distribution obtained from AFM measurements, coefficient of variation=10.9%. **d**, The stiffness frequency distribution from nanoindentation measurements, coefficient of variation=14.4%. Panels adapted with permission from ref.<sup>10</sup>, Wiley.

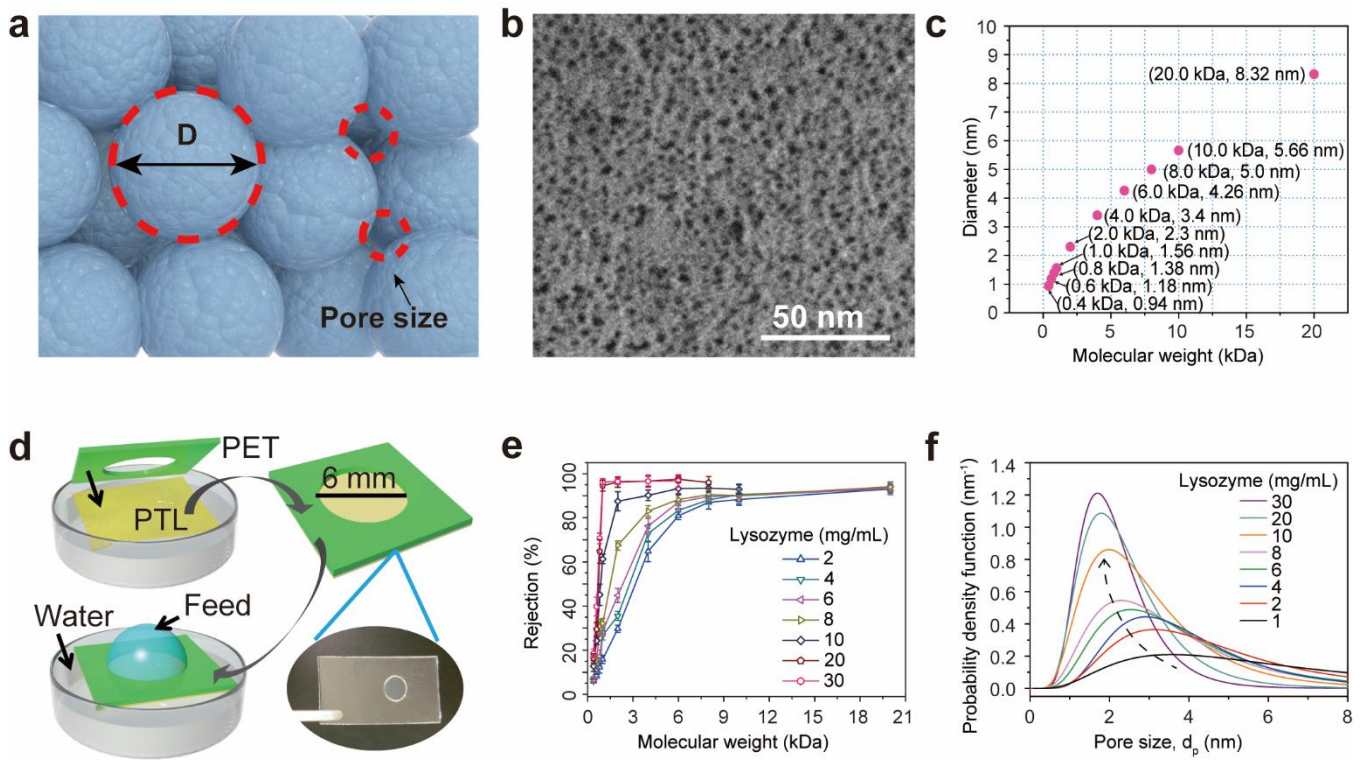

**Supplementary Fig. 6 | The regulation of pore size of 2D protein film.** **a**, Schematic of the pores resulting from the packing of oligomer particles. The pore diameter ( $d$ ) and particle size ( $D$ ) have a relationship of  $d = D(2-\sqrt{3})/\sqrt{3} = 0.1547D$ . **b**, TEM bright-field image of the protein film. **c**, Stokes radii of PEG with different molecular weight. **d**, Schematic of the PEG permeation analysis. The film is transferred to a PET substrate with a pore size of 6 mm. **e**, The rejection of PEGs with different molecular weight by the films prepared at different protein concentration. **f**, The pore size distribution of the 2D lysozyme film shown by a probability density function curve.



**Supplementary Table 1 | 2D protein film-based composite films and their applications.**

| References | Functional block           | Protein                                                                      | New property                                           | Application                                                     |
|------------|----------------------------|------------------------------------------------------------------------------|--------------------------------------------------------|-----------------------------------------------------------------|
| 11         | Tin ion                    | Lysozyme                                                                     | Electrocatalytic                                       | Electrocatalytic                                                |
| 12         | Silver nanoparticle        | Lysozyme, BSA, $\alpha$ -amylase, collagen, keratin, pepsin, and egg albumin | Electrical conductivity sensitive to slight vibrations | Stealth Information Transmission                                |
| 13         | Graphene                   | Lysozyme                                                                     | Photothermal effect                                    | Photoactuation                                                  |
| 14         | PEG                        | Lysozyme                                                                     | Antifouling                                            | Seal dentinal tubules towards dentin hypersensitivity treatment |
| 15         | Perfluorooctanoyl fluoride | Lysozyme                                                                     | Superhydrophobicity                                    | Protein Crystallization                                         |
| 16         | Carnauba wax               | Lysozyme                                                                     | Superhydrophobicity                                    | Packaging and blood-repelling materials                         |
| 17         | Sodium alginate            | Lysozyme                                                                     | High tenacity                                          | Controlling the crack development of the conductive layer       |
| 18         | $\beta$ -cyclodextrin      | Lysozyme                                                                     | Strong adsorption to uranium ions                      | Extract uranium ions from aqueous                               |
| 1          | 9,10-distyrylanthracene    | Lysozyme                                                                     | Stable fluorescence                                    | Anti-counterfeiting                                             |
| 19         | C-terminal Amelogenin      | Lysozyme                                                                     | Oriented arrangement of amorphous calcium              | Enamel Remineralization                                         |
| 20         | Plant extracts and ZnO     | BSA                                                                          | High ultraviolet absorption                            | Sunscreen                                                       |
| 21         | Laponite                   | BSA                                                                          | High hygroscopicity                                    | Smart window                                                    |
| 22         | $\epsilon$ -Polylysine     | BSA                                                                          | Effective antibacterial activity                       | Antibacterial coating                                           |
| 23         | Cyclosporin A              | Lactoferrin                                                                  | Increasing the bioavailability of cyclosporin A        | Treatment for dry eye syndrome                                  |

**Supplementary Table 2 | Encapsulation of different functional blocks into 2D protein film**

| Proteins | Functional block | Procedure                                                                                                                                                                                                                                                                                                        |
|----------|------------------|------------------------------------------------------------------------------------------------------------------------------------------------------------------------------------------------------------------------------------------------------------------------------------------------------------------|
| Lysozyme | Graphene         | Mix the following three solutions in equal volume and incubated at 30 °C for 8 hours. After that, adjust the pH of the mixture to $\sim$ 2.2 and further incubate the system at 90 °C for at 6 hours:<br>GO aqueous dispersion (3 mg/ml)<br>Lysozyme aqueous dispersion<br>TCEP aqueous solution (pH 4.5, 50 mM) |
| Lysozyme | Sodium alginate  | Mix the following two solutions and incubate the system at room temperature for 2                                                                                                                                                                                                                                |

| <b>Proteins</b> | <b>Functional block</b>        | <b>Procedure</b>                                                                                                                                                                                                                                                                                                                                                                                                                                                                                                                                     |
|-----------------|--------------------------------|------------------------------------------------------------------------------------------------------------------------------------------------------------------------------------------------------------------------------------------------------------------------------------------------------------------------------------------------------------------------------------------------------------------------------------------------------------------------------------------------------------------------------------------------------|
|                 |                                | hours:                                                                                                                                                                                                                                                                                                                                                                                                                                                                                                                                               |
|                 |                                | 1 ml of lysozyme HEPES buffer solution (8 mg/ml, pH 7.4)                                                                                                                                                                                                                                                                                                                                                                                                                                                                                             |
|                 |                                | 1 ml of sodium alginate aqueous solution (2 mg/ml)                                                                                                                                                                                                                                                                                                                                                                                                                                                                                                   |
|                 |                                | 2 ml of TCEP aqueous solution (pH 7.0, 50 mM)                                                                                                                                                                                                                                                                                                                                                                                                                                                                                                        |
| Lysozyme        | 9,10-distyrylanthracene (DSAI) | Mix the following three solutions at a volume ratio of 1 : 0.2 : 1 and incubate the system at room temperature for 2 hours:<br>Lysozyme (2 mg/ml in 10 mM HEPES buffer at pH 7.2)<br>DSAI (0.1 mg/ml dispersed in water)<br>TCEP buffer (50 mM TCEP in 10 mM HEPES buffer at pH 5.0).                                                                                                                                                                                                                                                                |
| Lysozyme        | C-terminal Amelogenin (C-AMG)  | Mix the following three solutions in equal volume and incubate the system at room temperature for 2 hours:<br>Lysozyme/C-AMG solution (Lysozyme: 2 mg/ml, pH=7.4; C-terminal Amelogenin: 1 mg/ml)<br>TCEP (50 mM, pH=5.8)                                                                                                                                                                                                                                                                                                                            |
| BSA             | Laponite                       | BSA-glycerol dispersion (100 mg of BSA, 100 mg of glycerol, 5 ml of water)<br>Laponite (Lap) dispersions (add 0, 12, 60, 120, or 180 mg of Lap powder into 12 ml of pure water under stirring at 600 rpm for 1 h).<br>Mix the BSA-glycerol and Lap dispersions and stir at 100 rpm for 5 h at room temperature.<br>Add 0.5 ml of TCEP aqueous solution (50 mM, pH 4.0) into BSA/Lap dispersion, and cast the system into a polytetrafluoroethylene (PTFE) mold, and a transparent film can be obtained after incubating at room temperature for 12h. |
| BSA             | $\epsilon$ -Polylysine         | Mix the following three solutions in equal volume and incubate the system at room temperature for 2 hours:<br>BSA aqueous solution (10 mg/ml)<br>TCEP aqueous solution (50 mM at pH 4.5)<br>$\epsilon$ -Polylysine aqueous solution (0.1-0.5 g/ml)                                                                                                                                                                                                                                                                                                   |
| Lactoferrin     | Cyclosporin A                  | Mix the following four solutions at a volume ratio of 15:15:15:n (n = 1, 2, 3, 4, 5, 6), and then incubated in a humid environment (generally for 6–12 h) at room temperature.                                                                                                                                                                                                                                                                                                                                                                       |

| Proteins | Functional block | Procedure                                                           |
|----------|------------------|---------------------------------------------------------------------|
|          |                  | Lactoferrin (7 mg/ml, pH 6.2),                                      |
|          |                  | Hyaluronic acid solution (6/9/12 mg/ml),                            |
|          |                  | TCEP solution (50 mM TCEP, pH 7.0),                                 |
|          |                  | Cyclosporin A solution (7.5 mg/ml in aqueous ethanol 50% by volume) |

## References

- Liu, R. *et al.*, Aggregation-induced emission of a 2D protein supramolecular nanofilm with emergent functions. *Materials Chemistry Frontiers* **4**, 1256 (2020).
- Gu, J., Su, Y., Liu, P., Li, P. & Yang, P., An Environmentally Benign Antimicrobial Coating Based on a Protein Supramolecular Assembly. *ACS Applied Materials & Interfaces* **9**, 198 (2017).
- Hu, X. *et al.*, Amyloid-Like Protein Aggregates: A New Class of Bioinspired Materials Merging an Interfacial Anchor with Antifouling. *Advanced Materials* **32**, 2000128 (2020).
- Yang, F., Tao, F., Li, C., Gao, L. & Yang, P., Self-assembled membrane composed of amyloid-like proteins for efficient size-selective molecular separation and dialysis. *Nature Communications* **9**, 5443 (2018).
- Su, H. *et al.*, Amyloid - Like Protein Aggregation Toward Pesticide Reduction. *Advanced Science* **9**, 2105106 (2022).
- Wang, D. *et al.*, 2D Protein Supramolecular Nanofilm with Exceptionally Large Area and Emergent Functions. *Advanced Materials* **28**, 7414 (2016).
- Zhao, J. *et al.*, Self-assembled proteinaceous wound dressings attenuate secondary trauma and improve wound healing in vivo. *Journal of Materials Chemistry B* **6**, 4645 (2018).
- Liu, R. *et al.*, One-Step Assembly of a Biomimetic Biopolymer Coating for Particle Surface Engineering. *Advanced Materials* **30**, 1802851 (2018).
- Ha, Y. *et al.*, Phase-Transited Lysozyme as a Universal Route to Bioactive Hydroxyapatite Crystalline Film. *Advanced Functional Materials* **28**, 1704476 (2018).
- Xu, Y. *et al.*, The Synthesis of a 2D Ultra-Large Protein Supramolecular Nanofilm by Chemoselective Thiol - Disulfide Exchange and its Emergent Functions. *Angewandte Chemie International Edition* **59**, 2850 (2020).
- Saif, B., Zhang, W., Zhang, X., Gu, Q. & Yang, P., Sn-Triggered Two-Dimensional Fast Protein Assembly with Emergent Functions. *ACS Nano* **13**, 7736 (2019).
- Qin, R. *et al.*, Protein-Bound Freestanding 2D Metal Film for Stealth Information Transmission. *Advanced Materials* **31**, 1803377 (2019).
- Zhao, J., Li, Q., Miao, B., Pi, H. & Yang, P., Controlling Long-Distance Photoactuation with Protein Additives. *Small* **16**, 2000043 (2020).
- Li, C., Lu, D., Deng, J., Zhang, X. & Yang, P., Amyloid-Like Rapid Surface Modification for Antifouling and In-Depth Remineralization of Dentine Tubules to Treat Dental Hypersensitivity. *Advanced Materials* **31**, 1903973 (2019).
- Gao, A. *et al.*, A Superhydrophobic Surface Templated by Protein Self-Assembly and Emerging Application toward Protein Crystallization. *Advanced Materials* **28**, 579 (2016).
- Li, J. *et al.*, All-natural superhydrophobic coating for packaging and blood-repelling materials. *Chemical Engineering Journal* **410**, 128347 (2021).
- Chen, M. *et al.*, Crack Suppression in Conductive Film by Amyloid - Like Protein Aggregation toward Flexible Device. *Advanced Materials* **33**, 2104187 (2021).
- Yang, Q. *et al.*, An amyloid-like proteinaceous adsorbent for uranium extraction from aqueous medium. *Journal of Materials Chemistry A* **10**, 14906 (2022).

19. Wang, D. *et al.*, Controlling Enamel Remineralization by Amyloid-Like Amelogenin Mimics. *Advanced Materials* **32**, 2002080 (2020).
20. Chang, M. *et al.*, Suppression of Sunscreen Leakage in Water by Amyloid-like Protein Aggregates. *ACS Applied Materials & Interfaces* **13**, 42451 (2021).
21. Zhao, J., Miao, B. & Yang, P., Biomimetic Amyloid-like Protein/Laponite Nanocomposite Thin Film through Regulating Protein Conformation. *ACS Applied Materials & Interfaces* **12**, 35435 (2020).
22. Tian, J. *et al.*, Amyloid-like protein aggregates combining antifouling with antibacterial activity. *Biomaterials Science* **8**, 6903 (2020).
23. Qin, R. *et al.*, Instant Adhesion of Amyloid-like Nanofilms with Wet Surfaces. *ACS Central Science* **8**, 705 (2022).
