# Supplementary material for: Synthesis and functionalization of scalable and versatile 2D protein films via amyloid-like aggregation
Source: Springer Nature journal article supplement (doi:10.1038/s41596-023-00918-4), 2023-12-04
Supplement: MOESM3 [file 41596_2023_918_MOESM3_ESM14.xlsx]

## Sheet: Sheet1
Thickness (nm)	Root mean square (nm)	Stiffness (μN/nm)
80.8078	2.01	1.906
75.34	1.92	2.04
73.1064	2.42	1.387
78.5079	2.57	1.53
73.216	2.37	2.4
74.9889	2.24	1.77
65.3127	2.51	1.33
70.2089	1.962	1.34
70.2028	2.55	2.06
70.0739	1.96	1.92
70.0136	1.99	1.84
70.4756	2.34	1.32
74.5568	2.63	1.21
73.0546	2.57	1.25
71.4146	2.42	1.38
72.0127	2.04	1.07
69.7621	2.36	1.19
69.9444	2.45	1.23
70.2139	2.53
71.7842	2.4
72.6235	2.17
69.7842	1.9
	2.07
	2.761
	2.09
	2.72
	2.53
